# Supplementary material for: NOxreduction by CO over ASC catalysts in a simulated rotary reactor: effect of CO2, H2O and SO2
Source: Royal Society of Chemistry journal article supplement (doi:10.1039/c8ra07658h), 2018-01-01
Supplement: c8ra07658h1.pdf [file c8ra07658h1.pdf]

## Supporting information

### **NO<sub>x</sub> reduction by CO over ASC catalysts in a simulated rotary reactor: effect of CO<sub>2</sub>, H<sub>2</sub>O and SO<sub>2</sub>**

Peiliang Sun<sup>a,b</sup>, Xingxing Cheng<sup>a,b,1\*</sup>, Yanhua Lai<sup>b,\*</sup>, Zhiqiang Wang<sup>a,b</sup>, Chunyuan Ma<sup>a,b</sup>, Jingcai Chang<sup>a,b</sup>

<sup>a</sup> National Engineering Lab for Coal-fired Pollutant Emission Reduction, School of Energy and Power Engineering, Shandong University, Jinan, 250061, China

<sup>b</sup> School of Energy and Power Engineering, Shandong University, Jinan, 250061, China

---

\* Corresponding Authors. Xingxing Cheng, tel: (86) 531-88399372(615), fax: (86) 531-88385877, email: [xcheng@sdu.edu.cn](mailto:xcheng@sdu.edu.cn). Yanhua Lai, tel: (86) 531-88392637, email: [laiyh@sdu.edu.cn](mailto:laiyh@sdu.edu.cn)

**Fig. S1** The schematic of the fixed bed experimental system

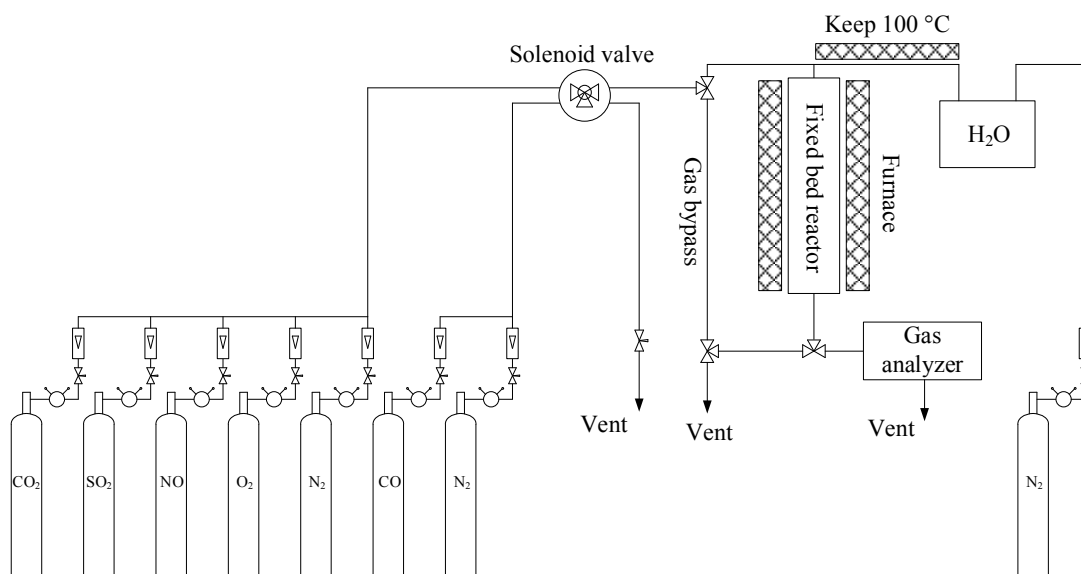

**Fig. S2** NO<sub>x</sub> adsorption capacity of catalysts at different temperatures in 800 s

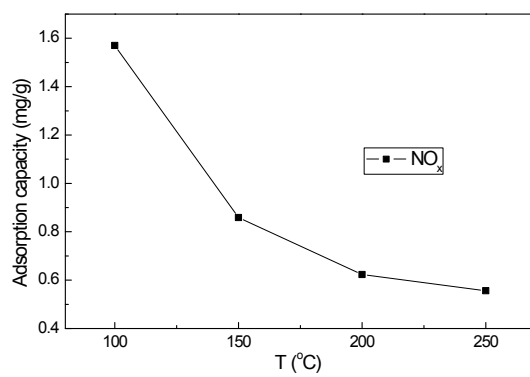

**Fig. S3** Dimensionless outlet  $\text{NO}_x$  concentration in the simulated rotary reactor. ((a)  $T = 200\text{ }^\circ\text{C}$ , (b)  $T = 250\text{ }^\circ\text{C}$ )

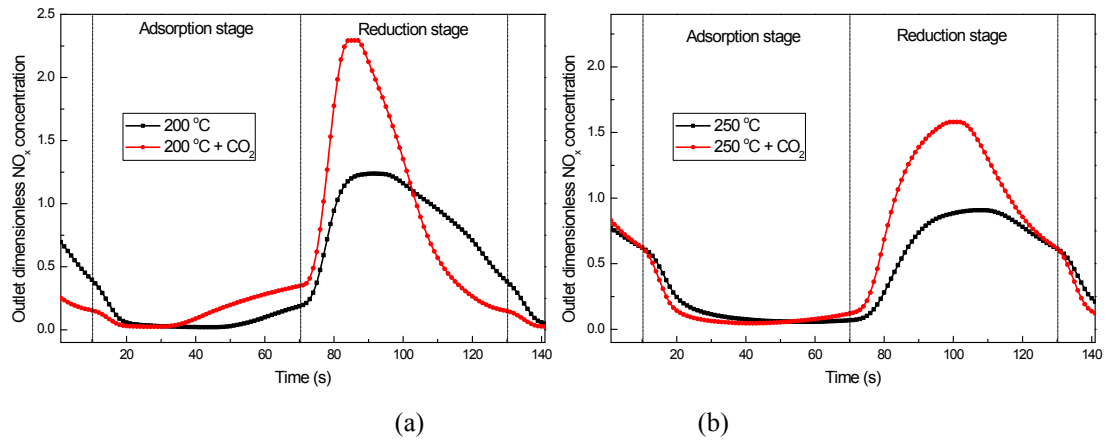

**Fig. S4** Dimensionless outlet  $\text{NO}_x$  concentration in the simulated rotary reactor. ((a)  $T = 200\text{ }^\circ\text{C}$ , (b)  $T = 250\text{ }^\circ\text{C}$ )

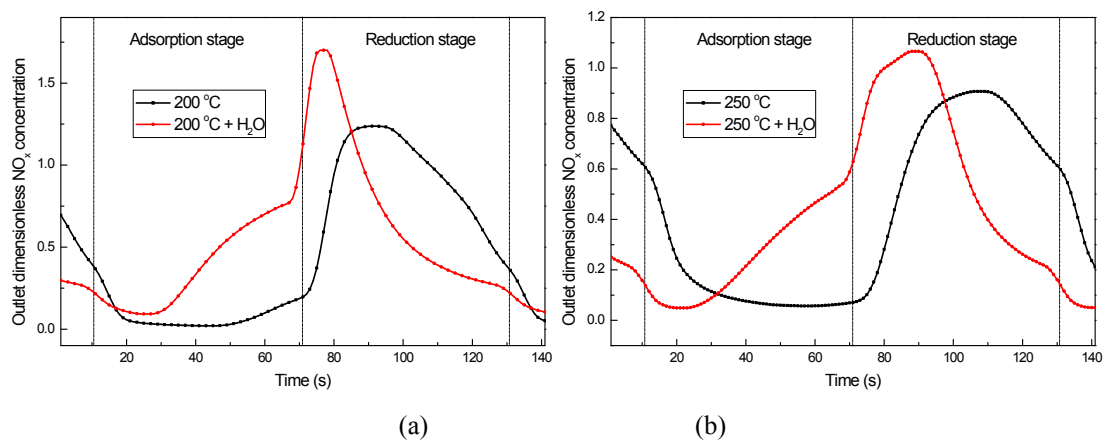

**Table S1** NO<sub>x</sub> adsorption capacity of catalysts under different conditions in 800 s

| Conditions                                   | Adsorption capacity (mg/g) |
|----------------------------------------------|----------------------------|
| Baseline group                               | 0.660                      |
| 15 % CO <sub>2</sub>                         | 0.580                      |
| 5 % H <sub>2</sub> O                         | 0.516                      |
| 10 % H <sub>2</sub> O                        | 0.330                      |
| 10 % H <sub>2</sub> O + 15 % CO <sub>2</sub> | 0.290                      |

**Table S2** The influence of CO<sub>2</sub> on the NO adsorption and reduction efficiencies

|        | NO adsorption efficiency |                        | NO reduction efficiency |                        |
|--------|--------------------------|------------------------|-------------------------|------------------------|
|        | no CO <sub>2</sub>       | adding CO <sub>2</sub> | no CO <sub>2</sub>      | adding CO <sub>2</sub> |
| 150 °C | 87.0%                    | 59.7%                  | 4.4%                    | 3.4%                   |
| 200 °C | 93.4%                    | 87.6%                  | 19.9%                   | 1.2%                   |
| 250 °C | 88.6%                    | 90.8%                  | 32.8%                   | 4.0%                   |

**Table S3** NO adsorption and reduction efficiencies of catalyst under wet condition

|        | NO adsorption efficiency |                         | NO reduction efficiency |                         |
|--------|--------------------------|-------------------------|-------------------------|-------------------------|
|        | no H <sub>2</sub> O      | adding H <sub>2</sub> O | no H <sub>2</sub> O     | adding H <sub>2</sub> O |
| 150 °C | 87.0%                    | 39.6%                   | 4.4%                    | 0.1%                    |
| 200 °C | 93.4%                    | 65.9%                   | 19.9%                   | 4.8%                    |
| 250 °C | 88.6%                    | 78.2%                   | 32.8%                   | 24.8%                   |

**Table S4** Influence of SO<sub>2</sub> on NO adsorption and reduction efficiencies

|        | NO adsorption efficiency |                               | NO reduction efficiency |                               |
|--------|--------------------------|-------------------------------|-------------------------|-------------------------------|
|        | no SO <sub>2</sub>       | adding SO <sub>2</sub> 45 min | no SO <sub>2</sub>      | adding SO <sub>2</sub> 45 min |
| 150 °C | 87.0%                    | 37.3%                         | 4.4%                    | 4.2%                          |
| 200 °C | 93.4%                    | 34.9%                         | 19.9%                   | 10.2%                         |
| 250 °C | 88.6%                    | 39.5%                         | 32.8%                   | 11.8%                         |
